# Supplementary material for: Novel risk genes and mechanisms implicated by exome sequencing of 2572 individuals with pulmonary arterial hypertension
Source: PubMed Central journal article supplement (PMC6857288; doi:10.1186/s13073-019-0685-z), 2019-11-14

**Figure S3. Locations of rare deleterious PAH patient-derived *BM***

***PR2***

**variants within the two-dimensional protein structure.** Predicted damaging missense (D-Mis) variants are shown above the protein schematic; likely-gene-disrupting (LGD including stopgain, frameshift, in-frame deletion and whole exon deletion) variants are below the schematic. The vertical gray lines indicate exon borders. E1(2) indicates a deletion of exon 1 identified in two cases; similar designations are used for the other whole exon deletions.

**BM<sub>PR</sub>2**

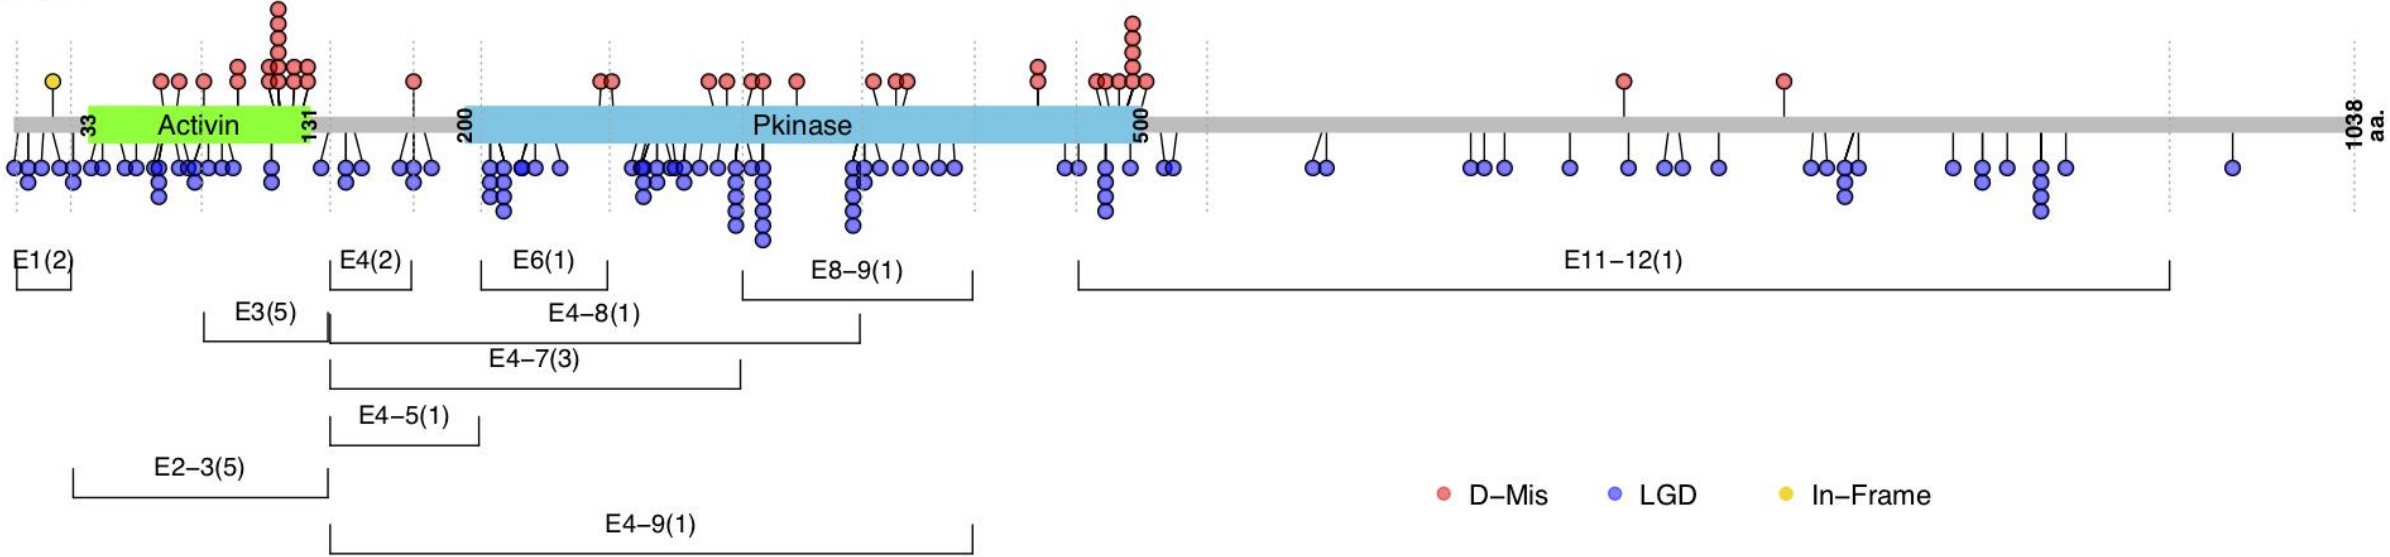

Supplement: 13073_2019_685_MOESM6_ESM.pdf [file 13073_2019_685_MOESM6_ESM.pdf]
