# Supplementary material for: Novel risk genes and mechanisms implicated by exome sequencing of 2572 individuals with pulmonary arterial hypertension
Source: PubMed Central journal article supplement (PMC6857288; doi:10.1186/s13073-019-0685-z), 2019-11-14

**Figure S5. Gene-level burden test for rare synonymous variants using 1832**

**European cases and 12,771 European controls.** Results of a binomial test confined to rare synonymous variants in 20,000 protein-coding genes.

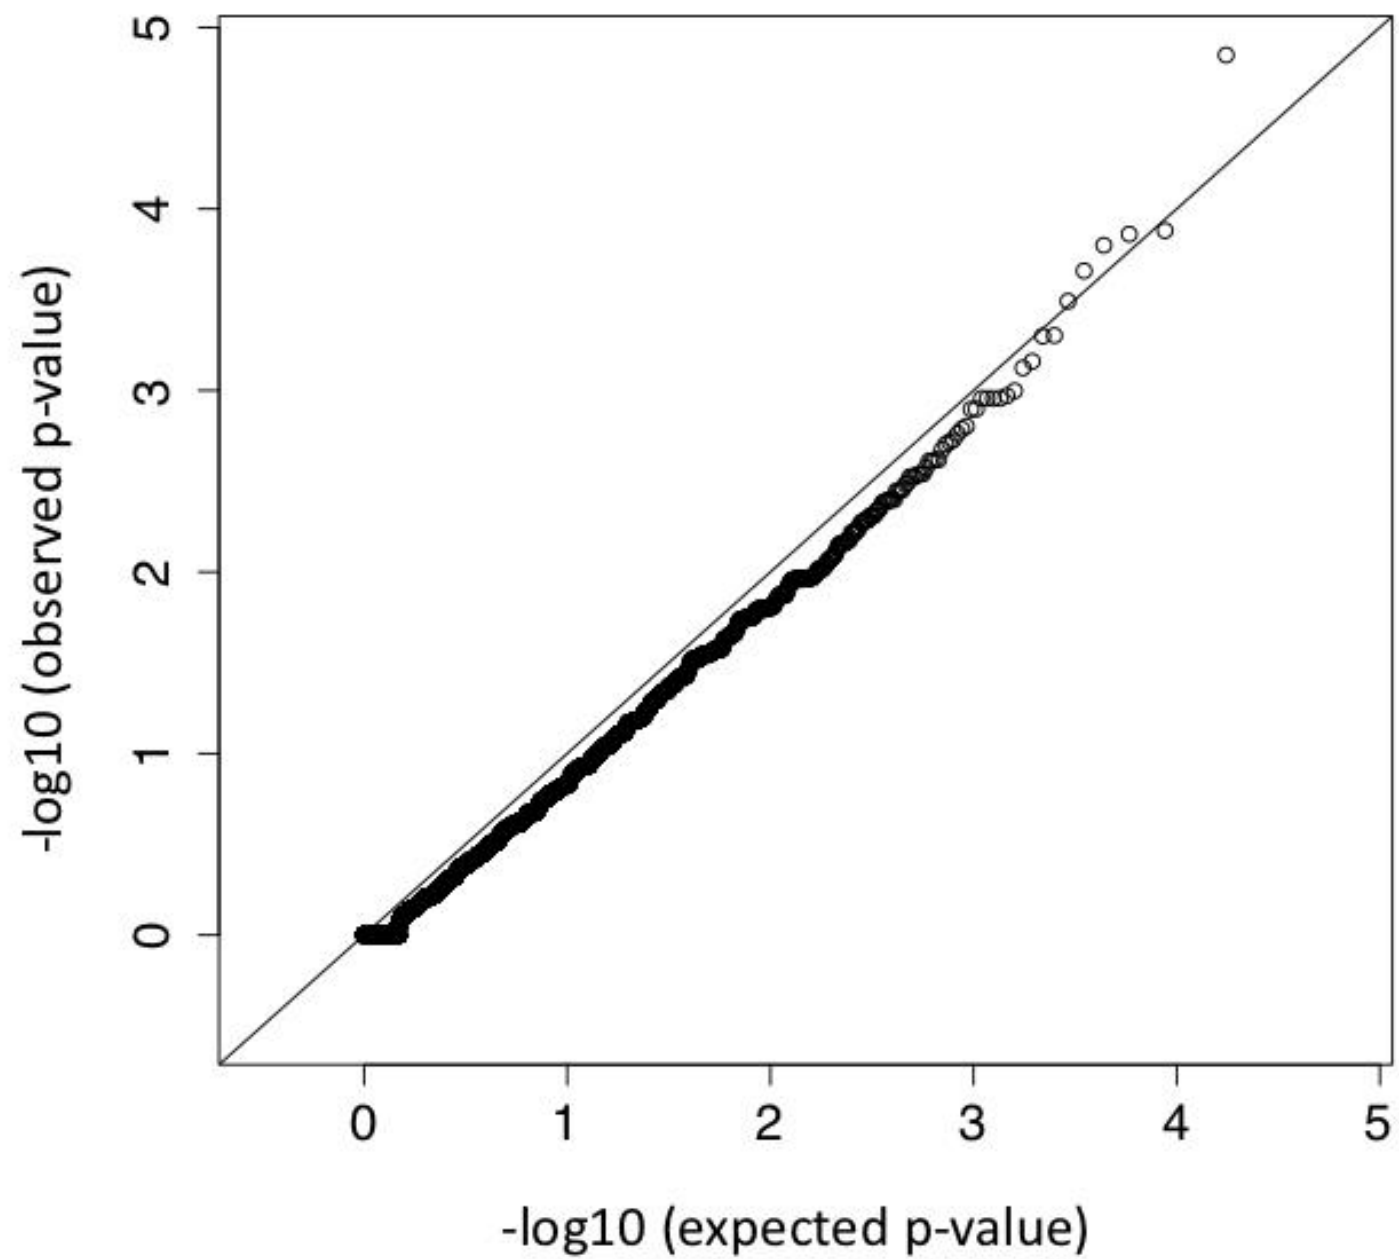

Supplement: 13073_2019_685_MOESM9_ESM.pdf [file 13073_2019_685_MOESM9_ESM.pdf]
